# Supplementary material for: Rbpj expression in regulatory T cells is critical for restraining TH2 responses
Source: PubMed Central journal article supplement (PMC6453958; doi:10.1038/s41467-019-09276-w), 2019-04-08
Supplement: 41467_2019_9276_MOESM1_ESM.pdf [file 41467_2019_9276_MOESM1_ESM.pdf]

## **Supplementary Information**

### **RBPJ expression in regulatory T cells is critical for restraining T<sub>H</sub>2 responses**

*Michael Delacher, Christian Schmidl, Yonatan Herzig, Minka Breloer, Wiebke Hartmann, Fabian Brunk, Danny Kägebein, Ulrike Träger, Ann-Cathrin Hofer, Sebastian Bittner, Dieter Weichenhan, Charles D. Imbusch, Agnes Hotz-Wagenblatt, Thomas Hielscher, Achim Breiling, Giuseppina Federico, Hermann-Josef Gröne, Roland M. Schmid, Michael Rehli, Jakub Abramson and Markus Feuerer*

# Supplementary Figure 1

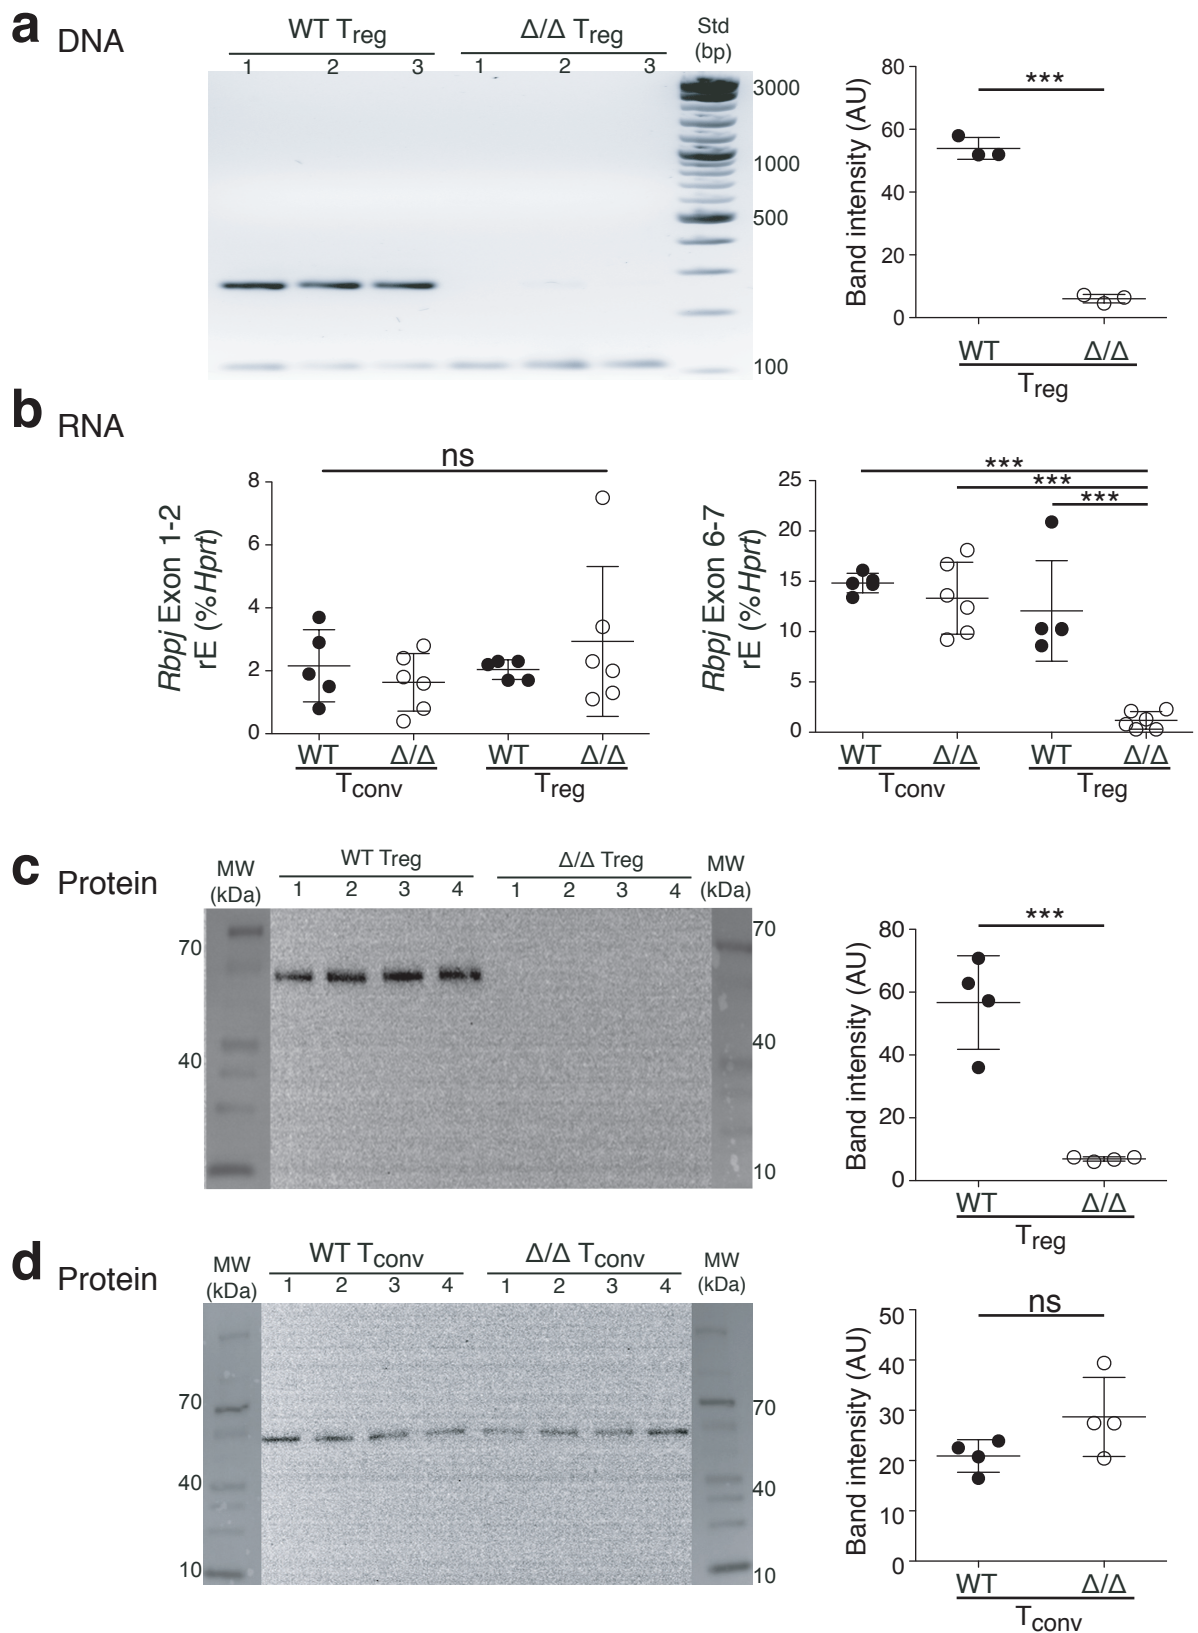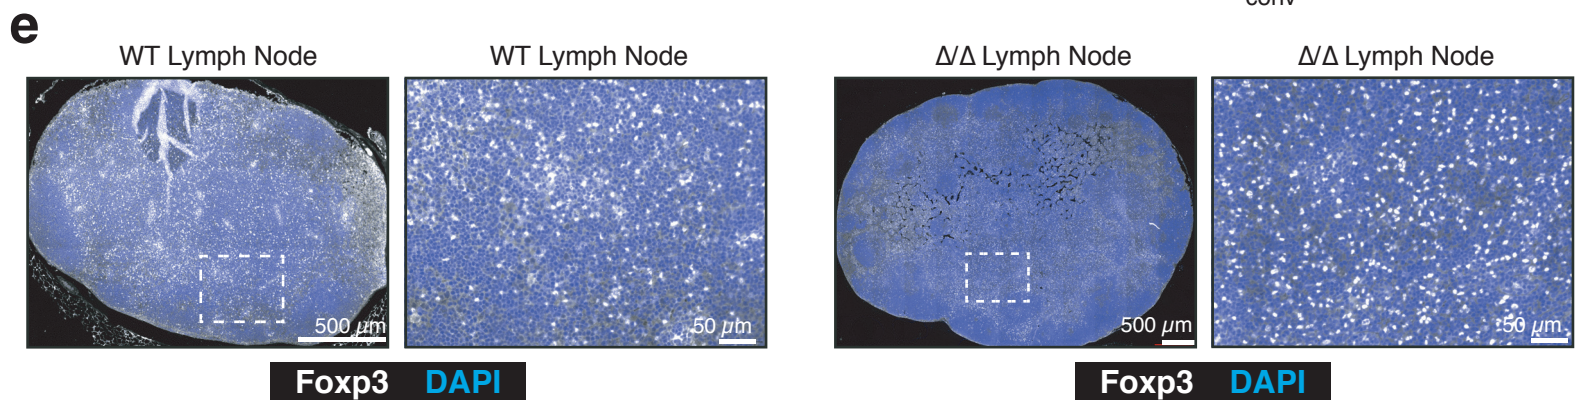

**Supplementary Figure 1. Confirmation of *Rbpj* deletion specificity in  $T_{reg}$  cells and immunohistochemistry of lymph nodes.** This supplementary figure is an extension of **Figure 1**. **(a)** Isolation of genomic DNA from FACS-isolated  $T_{reg}$  ( $CD3^+CD4^+CD8^-CD25^+Foxp3-YFP^+$ ) and  $T_{conv}$  ( $CD3^+CD4^+CD8^-CD25^-Foxp3-YFP^-$ ) cells from WT or  $\Delta/\Delta$  animals followed by PCR amplification of *Rbpj* exon 6-7 region. PCR product in WT cells is expected at around 250 bp. Quantification of band staining intensity was performed with ImageJ software and plotted to the right (n=3, unpaired t test). **(b)** Real-time PCR measurement of *Rbpj* exon 1/2 and exon 6/7 with reversely-transcribed RNA isolated from  $T_{reg}$  and  $T_{conv}$  cells sorted from WT or  $\Delta/\Delta$  animals. Statistical quantification with one-way ANOVA and Bonferroni post-test (n=5-6). **(c, d)** Western Blot with FACS-isolated  $T_{reg}$  **(c)** and  $T_{conv}$  **(d)** cells isolated from WT or  $\Delta/\Delta$  animals. We used an antibody against *Rbpj* followed by chromogenic detection. Quantification of band staining intensity with ImageJ software, plotted to the right (n=4, unpaired t test). **(e)** Immunohistochemistry of whole lymph nodes from WT (left) vs. affected  $\Delta/\Delta$  animals (right). Left-handed images show the whole lymph node with a rectangular section, while the right-hand images are a magnification of this rectangular selection. Foxp3 staining in white, DAPI nuclear staining in blue. Color intensities of images have been adjusted individually. Source data are provided as a Source Data file.

# Supplementary Figure 2

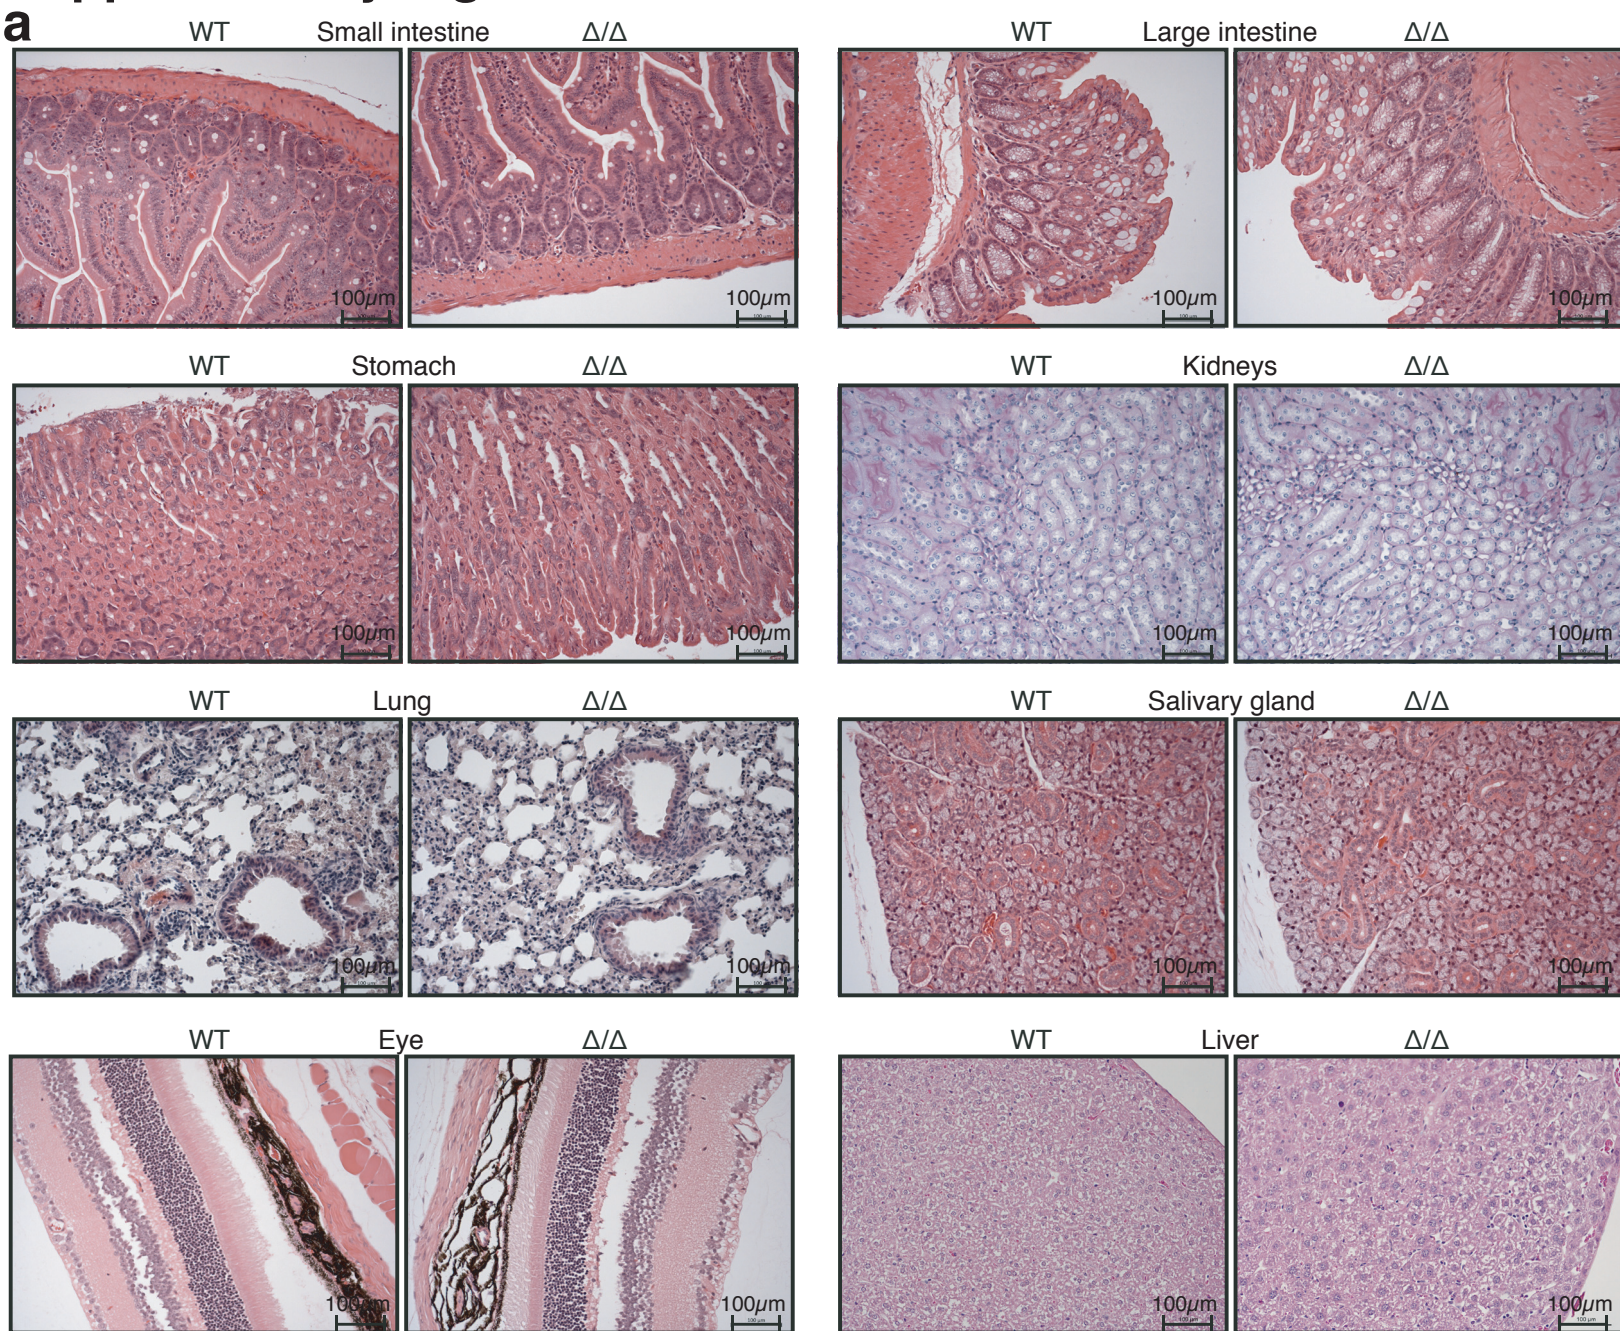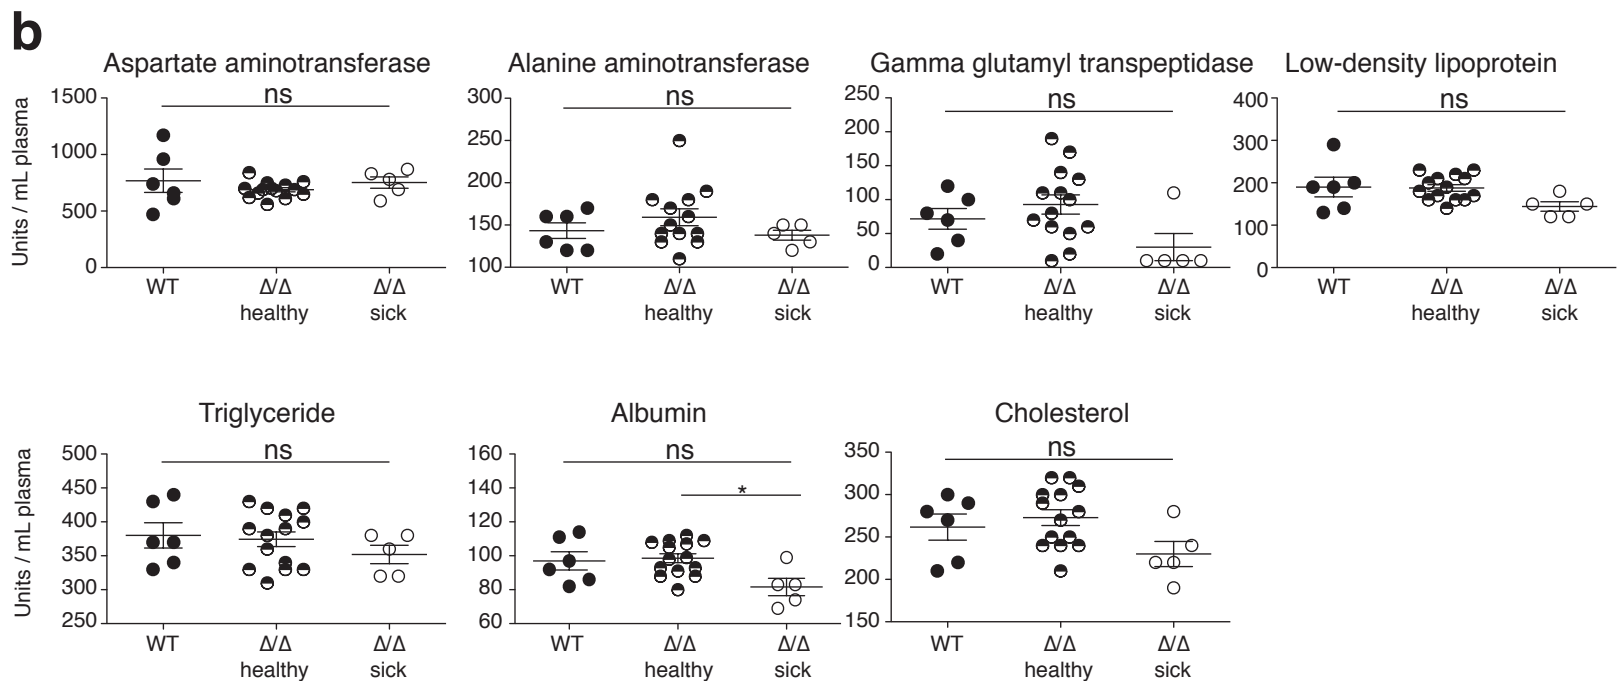

**Supplementary Figure 2. Organ pathology and peripheral blood serum parameters.** This supplementary figure is an extension of **Figure 1**. (a) H&E staining of small intestine, large intestine, stomach, lung, salivary gland, eye and liver in WT and  $\Delta/\Delta$  animals; Periodic Acid-Schiff staining of kidneys.  $\geq 5$  animals of each genotype were observed. Representative images are shown. (b) Peripheral blood serum was collected from six healthy WT animals, fourteen healthy  $\Delta/\Delta$  animals, and five affected  $\Delta/\Delta$  animals. Blood parameters were statistically evaluated by one-way ANOVA with Bonferroni post-test ( $*=p<0.05$ ;  $ns=p>0.05$ ). We measured AST (aspartate aminotransferase), ALT (Alanine aminotransferase), GGT (Gamma glutamyl transpeptidase), LDL (Low-density lipoprotein), triglyceride, albumin and cholesterol levels. Source data are provided as a Source Data file.

# Supplementary Figure 3

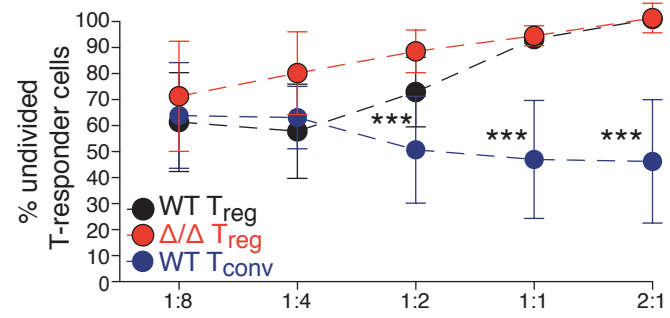

**Supplementary Figure 3. *In-vitro* Treg suppression assay with T<sub>reg</sub> cells from affected  $\Delta/\Delta$  animals vs WT animals.** *In-vitro* T<sub>reg</sub> suppression assay with T<sub>reg</sub> or T<sub>conv</sub> cells isolated from WT (black) or affected  $\Delta/\Delta$  (red) animals. X-axis T<sub>reg</sub> or T<sub>conv</sub> to T-responder cell ratio. T-responder cells isolated from congenic donor animals, CFSE-labeled and stimulated with antigen-presenting cells plus anti-CD3 antibody. Y-axis percentage of undivided T-responder cells. Statistical analysis two-way ANOVA and Bonferroni post-test (n=6). Source data are provided as a Source Data file.

# Supplementary Figure 4

**a**

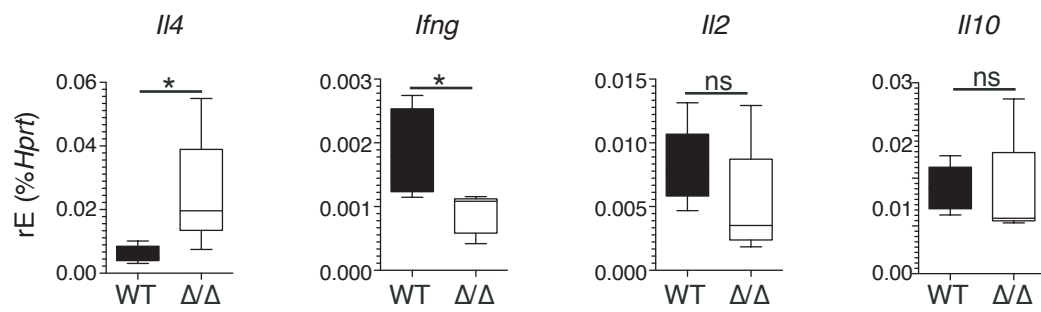

**b**

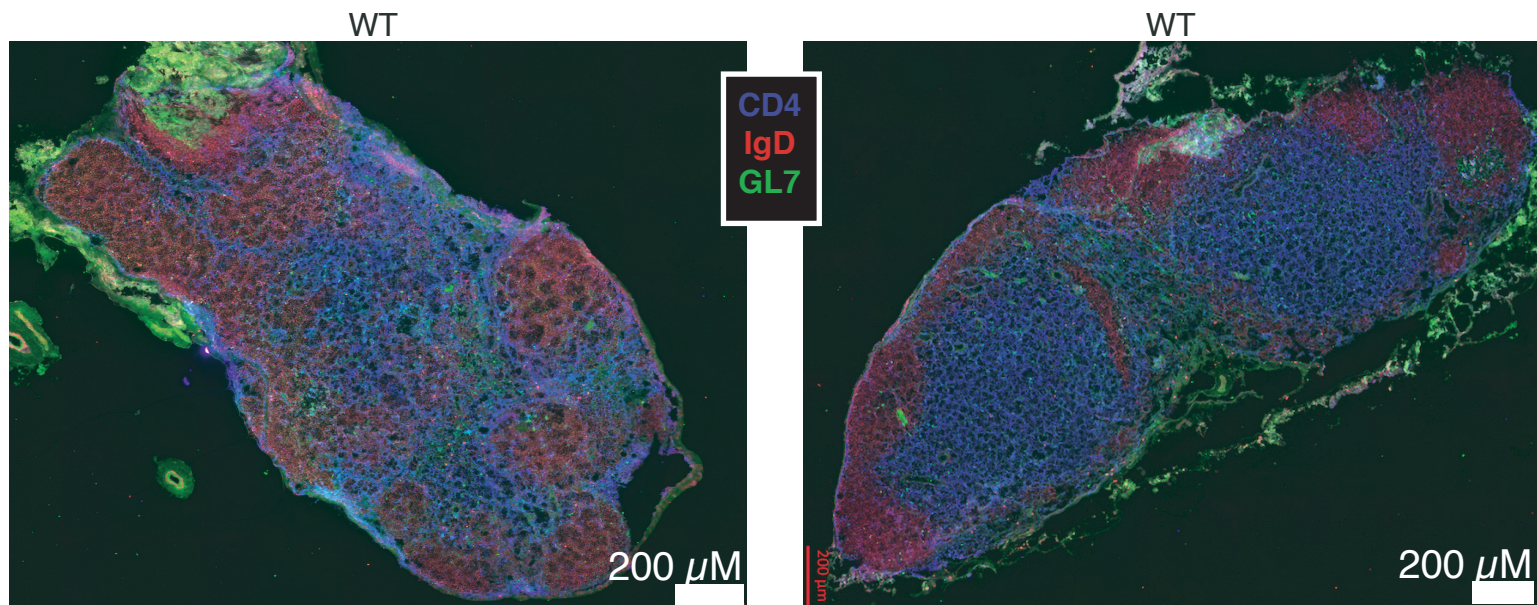

**c**

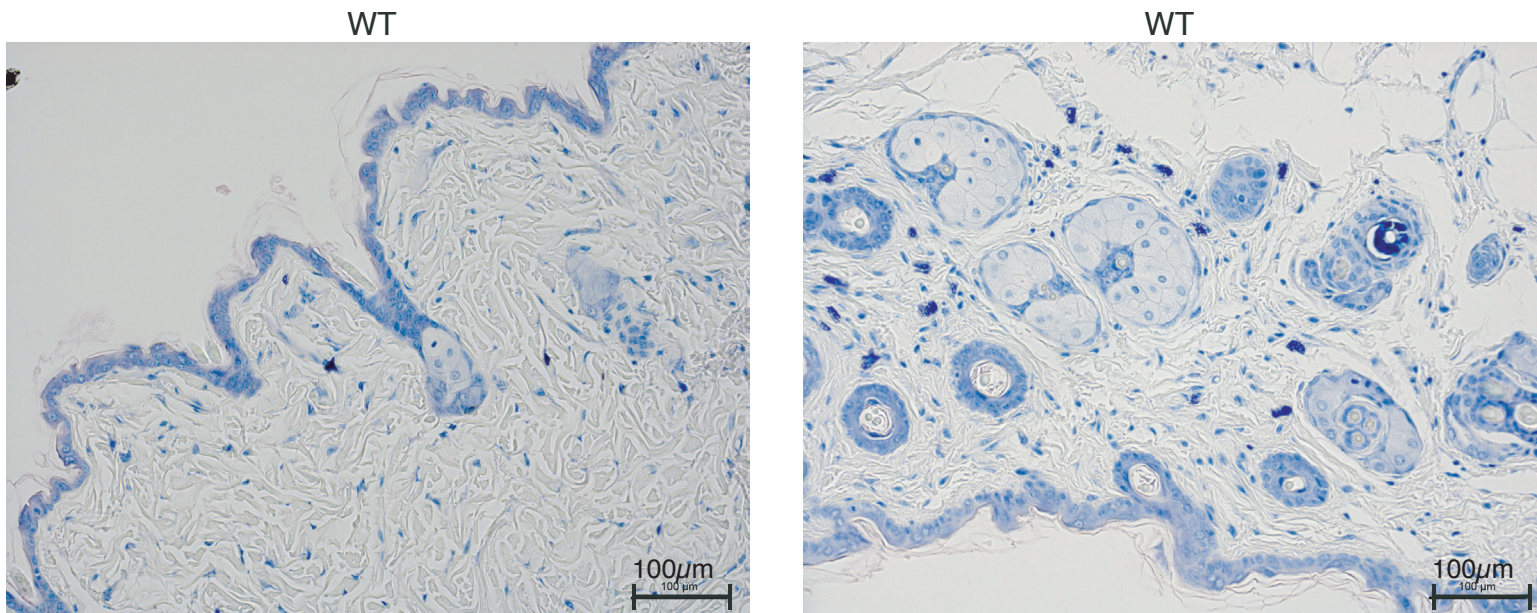



**Supplementary Figure 4. Lymph node gene expression, germinal center formation, and Giemsa staining of skin.** This supplementary figure is an extension of **Figure 2**. **(a)** qPCR expression of target genes in lymph nodes. Plotted are gene expression values for *Il4*, *Ifng*, *Il2*, *Il10* in WT (black) and affected  $\Delta/\Delta$  (white) animal-derived lymph nodes (n=5, unpaired t test). **(b)** This is an extension of **Figure 2d**. Additional immunohistochemistry of LN from WT mice. CD4 staining in blue, IgD staining in red, and GL7 staining in green. All images have been recorded with same settings and color intensity adjustments have been performed for all images similarly. **(c)** This is an extension of **Figure 2e**. Giemsa staining of skin tissue from two WT animals. Mast cells are stained in blue. In IHC and Giemsa stainings, original magnification scale bars magnified for better visibility. Source data are provided as a Source Data file.

# Supplementary Figure 5

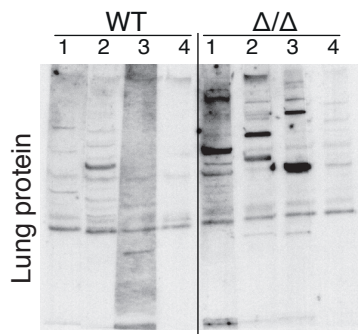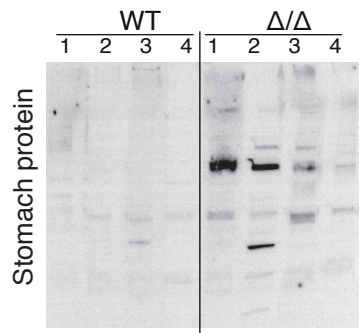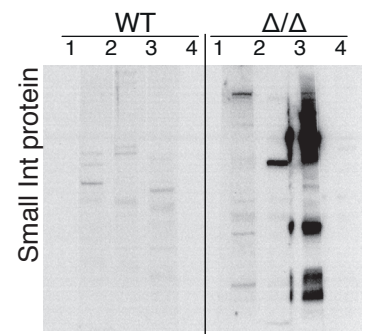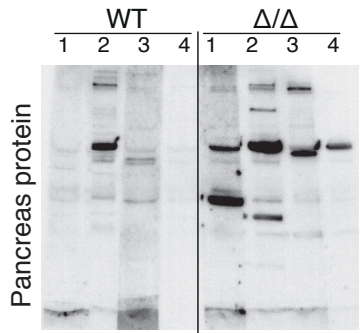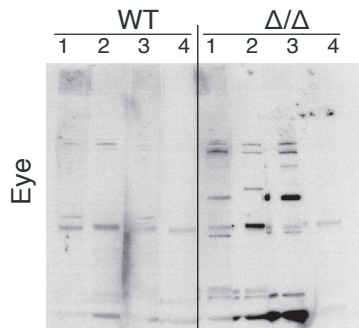

**Supplementary Figure 5. Autoantibody detection with blood serum from affected  $\Delta/\Delta$  animals vs WT animals.** This is an extension of **Figure 2**. Western Blot with serum from WT and affected  $\Delta/\Delta$  animals. Protein (lung, stomach, small intestine, pancreas or eye) from Rag2-deficient animals has been separated by SDS-PAGE and blotted, followed by incubation with blood serum and chromogenic detection of antibody binding (n=4).

# Supplementary Figure 6

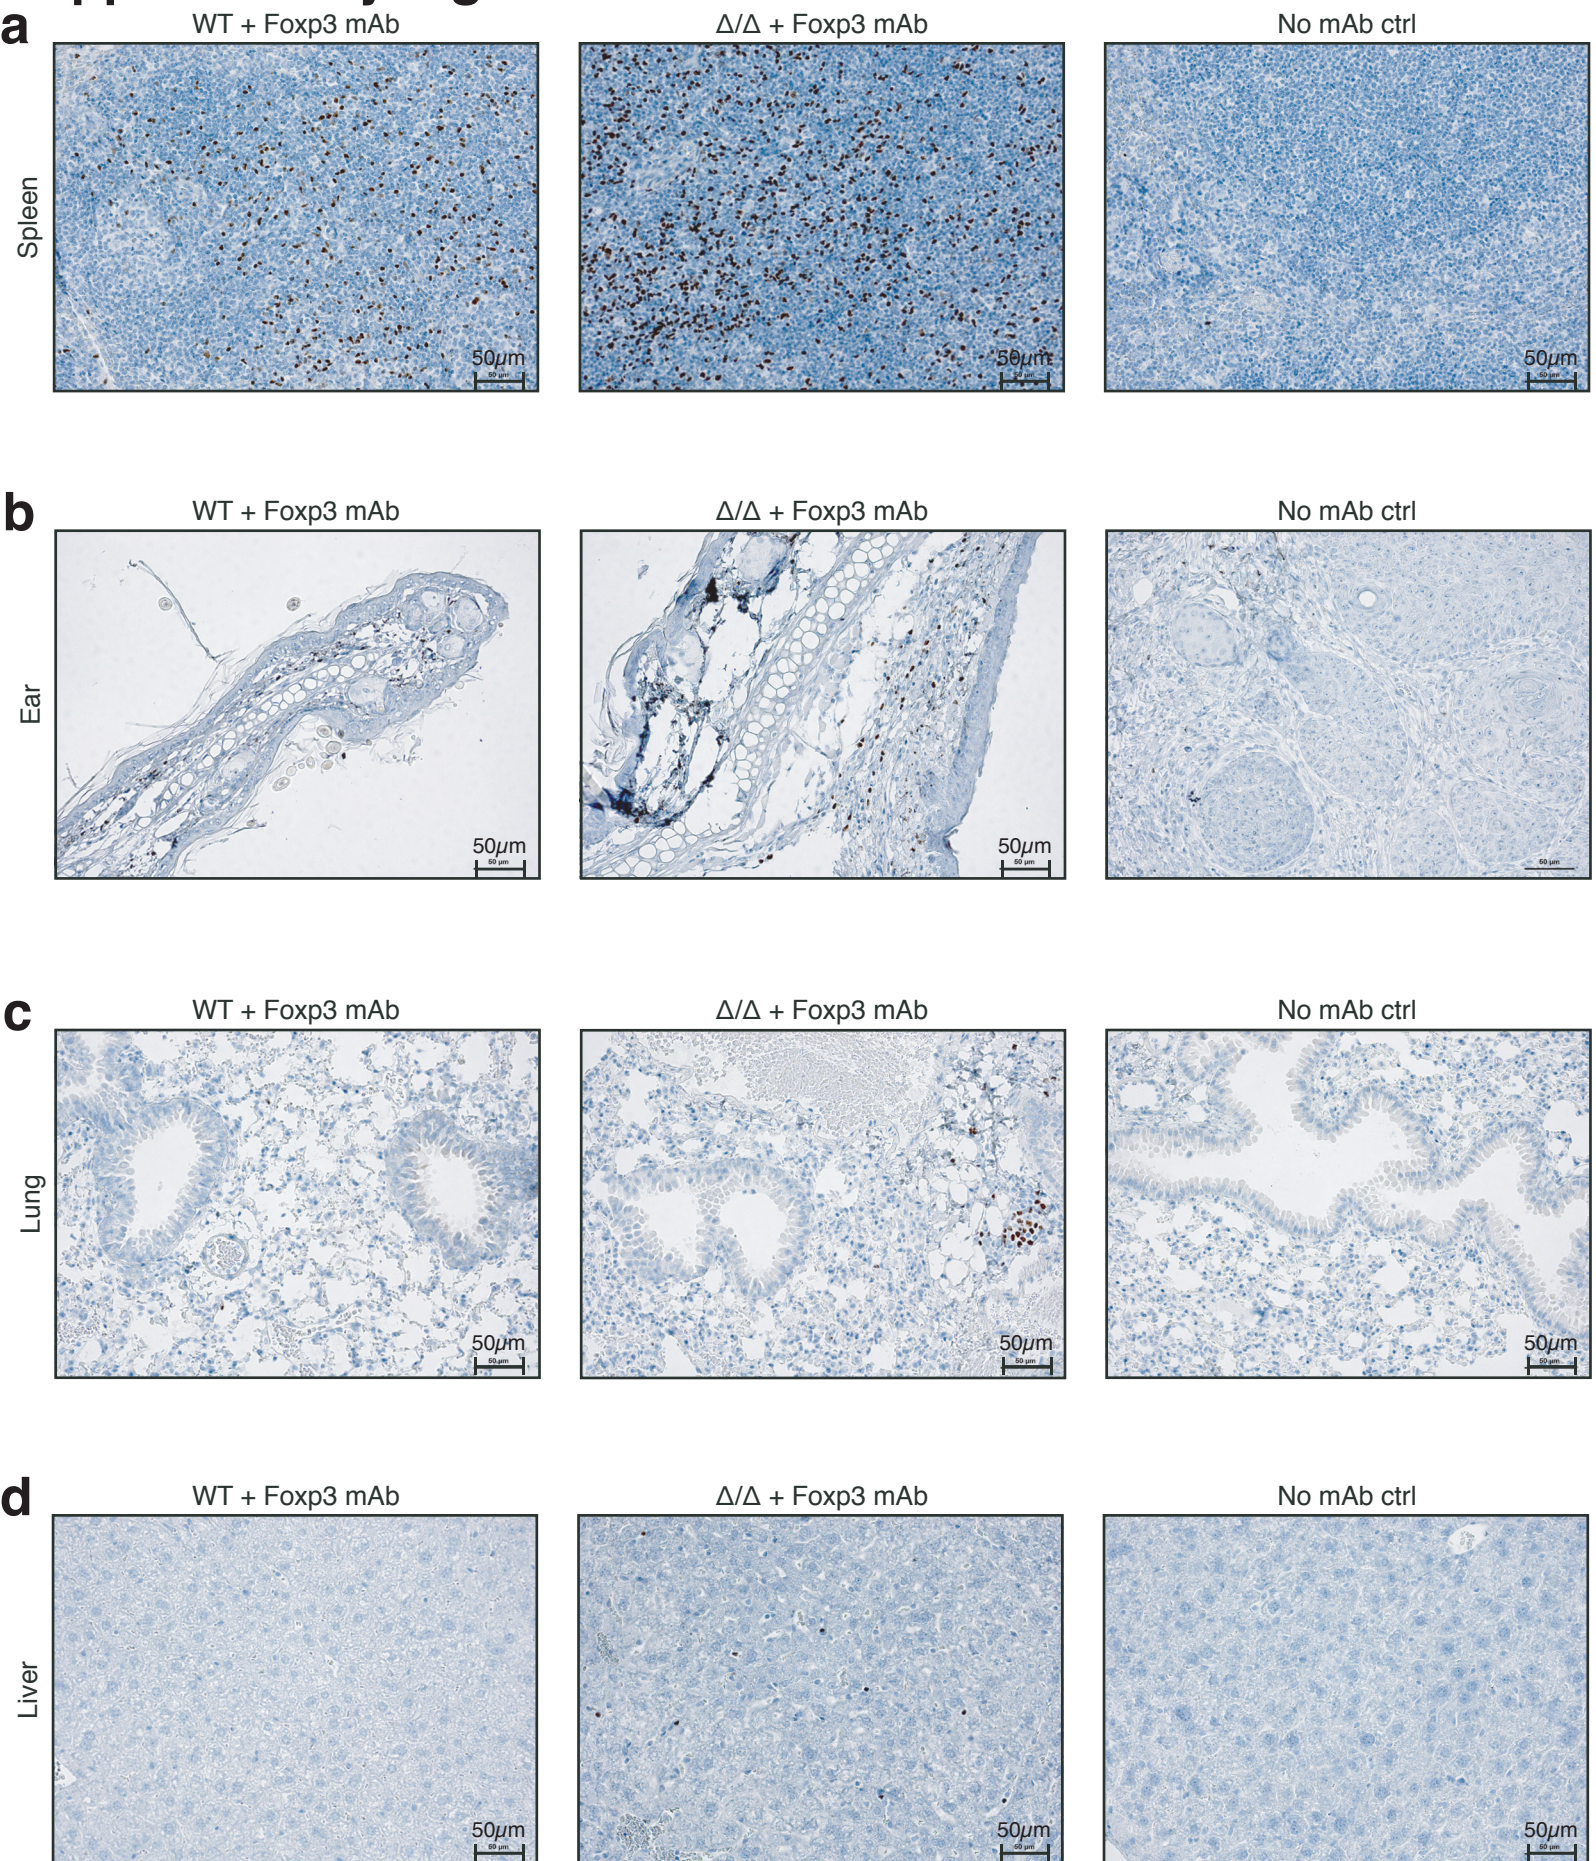

**Supplementary Figure 6. Foxp3 antibody staining on paraffin-embedded tissue sections.** This supplementary figure is an extension of **Figure 1e** and **Figure 5f**. Paraffin-embedded tissue sections were stained with a Foxp3 antibody, combined with Hematoxylin staining. **(a)** Staining of spleen tissue from wildtype animal (left) and affected  $\Delta/\Delta$  animal (middle) with Foxp3 antibody, same sample as in **Figure 1e**; control staining without Foxp3 antibody to the right. **(b)** Foxp3 staining ear tissue from wildtype animal (left) and affected  $\Delta/\Delta$  animal (middle) with Foxp3 antibody; control skin staining without Foxp3 antibody to the right. **(c)** Foxp3 staining of lung tissue from wildtype animal (left) and affected  $\Delta/\Delta$  animal (middle) with Foxp3 antibody as in **Figure 5f**; control staining without Foxp3 antibody to the right. **(d)** Foxp3 staining of liver tissue from wildtype animal (left) and affected  $\Delta/\Delta$  animal (middle) with Foxp3 antibody; control staining without Foxp3 antibody to the right.

# Supplementary Figure 7

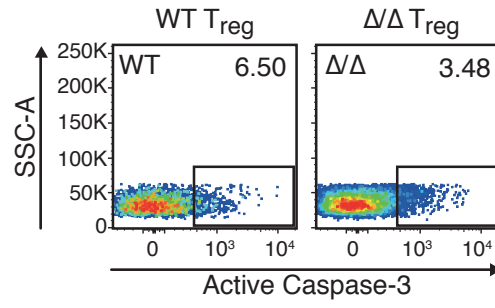

**Supplementary Figure 7. Analysis of active-caspase 3 in T<sub>reg</sub> cells from affected  $\Delta/\Delta$  animals vs WT animals.** Representative dot plots illustrating expression of active caspase-3 in T<sub>reg</sub> cells (CD3<sup>+</sup>CD4<sup>+</sup>CD8<sup>-</sup>CD25<sup>+</sup>Foxp3<sup>+</sup>). Source data are provided as a Source Data file.

# Supplementary Figure 8

**a**

Motifs found in 3,392 peaks up in  $\Delta/\Delta$

| Motif | p-value    | Family                  | Score                |
|-------|------------|-------------------------|----------------------|
|       | $10^{-68}$ | Gata3<br>Gata4<br>Gata6 | 0.95<br>0.95<br>0.94 |
|       | $10^{-46}$ | Ap1<br>CoupTf<br>Fra2   | 0.76<br>0.76<br>0.74 |
|       | $10^{-40}$ | Erg<br>Ets1<br>Elf3     | 0.95<br>0.94<br>0.93 |
|       | $10^{-35}$ | Gata<br>Runx<br>Runx2   | 0.69<br>0.69<br>0.67 |
|       | $10^{-32}$ | Eklf<br>Klf4<br>Klf5    | 0.93<br>0.90<br>0.88 |
|       | $10^{-26}$ | MafF<br>MafA<br>Cux2    | 0.73<br>0.70<br>0.62 |

**b**

Motifs found in 10816 peaks up in WT

| Motif | p-value     | Family                                    | Score                |
|-------|-------------|-------------------------------------------|----------------------|
|       | $10^{-116}$ | Pu1(Ets)<br>Ehf(Ets)<br>Etv2(Ets)         | 0.85<br>0.83<br>0.82 |
|       | $10^{-106}$ | Tcf3(Hmg)<br>Tcf4(Hmg)<br>Chr             | 0.95<br>0.95<br>0.71 |
|       | $10^{-71}$  | Stat5(Stat)<br>Stat1(Stat)<br>Stat4(Stat) | 0.97<br>0.90<br>0.87 |
|       | $10^{-49}$  | Nur77(N)<br>Esrrb(N)<br>Erra(N)           | 0.82<br>0.72<br>0.69 |
|       | $10^{-47}$  | Maz(Z)<br>Klf3(Z)<br>Znf467(Z)            | 0.89<br>0.75<br>0.74 |
|       | $10^{-39}$  | Bmal1(bH)<br>Clock(bH)<br>Usf2(bH)        | 0.80<br>0.80<br>0.79 |
|       | $10^{-27}$  | Rbpj1<br>Tbet<br>Tbr1                     | 0.84<br>0.75<br>0.70 |

**c**

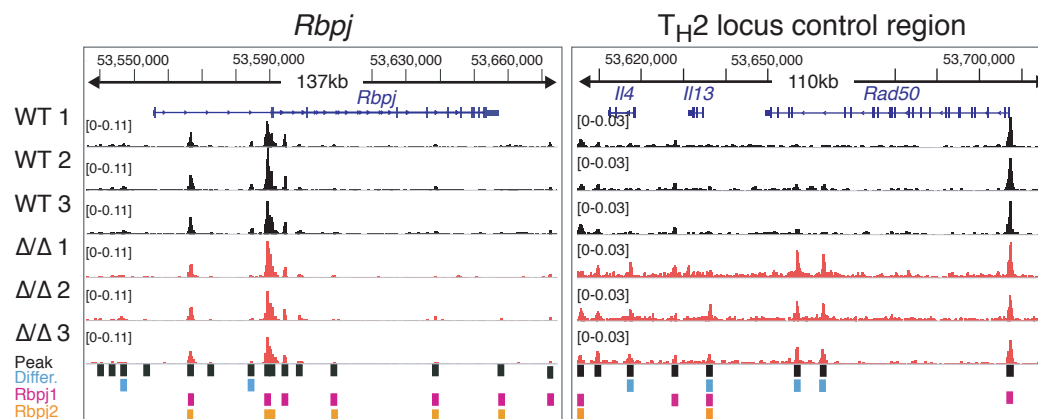



**Supplementary Figure 8. Motif analysis and ATAC-seq.** This supplementary figure is an extension of **Figure 8**. (a) *De novo* motif analysis in 3,392 peaks up in  $\Delta/\Delta$  T<sub>reg</sub> cells. Top enriched *de novo* motifs are shown, along with the corresponding p-value and the three most-similar known motifs (similarity score from 0-1, with 1 indicating an exact match). (b) *De novo* motif analysis in 10,816 peaks up in WT T<sub>reg</sub> cells. Top enriched *de novo* motifs are shown, along with the corresponding p-value and the three most-similar known motifs (similarity score from 0-1, with 1 indicating an exact match). (c) ATAC-seq genome browser tracks for two genes, *Rbpj* and the T<sub>H</sub>2 locus control region, with WT Klrp1<sup>-</sup> T<sub>reg</sub> cell data in black and  $\Delta/\Delta$  Klrp1<sup>+</sup> T<sub>reg</sub> cell data in red. Gene information is shown on top, along with the genomic location. Height indicates normalized ATAC-seq signal, the scale shown in brackets. All samples are group-normalized to allow peak height comparison. Below, all peaks (black squares), differential peaks (blue squares), instances of the *de-novo* Rbpj binding motif (purple) or the literature-based Rbpj motif (orange) are shown. Source data are provided as a Source Data file.

**Supplementary Table 1. List of antibodies, primers, critical chemicals and kits**

| <b>Antibodies</b>                                          |                |                             |
|------------------------------------------------------------|----------------|-----------------------------|
| Pacific Blue anti-mouse CD3 antibody                       | Biolegend      | <a href="#">AB 2028475</a>  |
| Brilliant Violet 711 anti-mouse CD3 antibody               | Biolegend      | <a href="#">AB 2563945</a>  |
| Purified anti-mouse CD3 antibody                           | Biolegend      | <a href="#">AB 312667</a>   |
| APC anti-mouse CD4 antibody                                | Biolegend      | <a href="#">AB 312719</a>   |
| APC/Cy7 anti-mouse CD4 antibody                            | Biolegend      | <a href="#">AB 312699</a>   |
| Biotin anti-mouse CD4 antibody                             | Biolegend      | <a href="#">AB 312711</a>   |
| Brilliant Violet 421 anti-mouse CD4 antibody               | Biolegend      | <a href="#">AB 11219790</a> |
| FITC anti-mouse CD4 antibody                               | Biolegend      | <a href="#">AB 312713</a>   |
| Brilliant Violet 711 anti-mouse CD4 antibody               | Biolegend      | <a href="#">AB 2562099</a>  |
| Brilliant Violet 605 anti-mouse CD4 antibody               | Biolegend      | <a href="#">AB 2563054</a>  |
| PE anti-mouse CD4 antibody                                 | Biolegend      | <a href="#">AB 312715</a>   |
| PE/Cy7 anti-mouse CD4 antibody                             | Biolegend      | <a href="#">AB 312729</a>   |
| PerCP/Cy5.5 anti-mouse CD4 antibody                        | Biolegend      | <a href="#">AB 893326</a>   |
| Brilliant UV 395 anti-mouse CD4 antibody                   | BD Biosciences | Cat# 563790                 |
| Brilliant UV 737 anti-mouse CD4 antibody                   | BD Biosciences | Cat# 564933                 |
| Biotin anti-mouse CD8a antibody                            | Biolegend      | <a href="#">AB 312743</a>   |
| Brilliant Violet 605 anti-mouse CD8a antibody              | Biolegend      | <a href="#">AB 2562609</a>  |
| PE/Cy7 anti-mouse CD8a antibody                            | Biolegend      | <a href="#">AB 312761</a>   |
| PerCP/Cy5.5 anti-mouse CD8a antibody                       | Biolegend      | <a href="#">AB 2075238</a>  |
| Biotin anti-mouse/human CD11b antibody                     | Biolegend      | <a href="#">AB 312787</a>   |
| Biotin anti-mouse CD11c antibody                           | Biolegend      | <a href="#">AB 313773</a>   |
| APC/Cy7 anti-mouse CD19 antibody                           | Biolegend      | <a href="#">AB 830707</a>   |
| Biotin anti-mouse CD19 antibody                            | Biolegend      | <a href="#">AB 313639</a>   |
| APC anti-mouse CD25 antibody                               | Biolegend      | <a href="#">AB 312861</a>   |
| Biotin anti-mouse CD25 antibody                            | Biolegend      | <a href="#">AB 312853</a>   |
| PE anti-mouse CD25 antibody                                | Biolegend      | <a href="#">AB 312857</a>   |
| PE/Cy7 anti-mouse CD25 antibody                            | Biolegend      | <a href="#">AB 312865</a>   |
| Brilliant Violet 711 anti-mouse CD25 antibody              | Biolegend      | <a href="#">AB 2564130</a>  |
| Pacific Blue anti-mouse/human CD44 antibody                | Biolegend      | <a href="#">AB 493683</a>   |
| Brilliant Violet 421 anti-mouse/human CD44 ab              | Biolegend      | <a href="#">AB 10895752</a> |
| Brilliant Violet 605 anti-mouse/human CD44 ab              | Biolegend      | <a href="#">AB 2562451</a>  |
| Brilliant Violet 421 anti-mouse CD45 antibody              | Biolegend      | <a href="#">AB 10899570</a> |
| APC/Cy7 anti-mouse CD45 antibody                           | Biolegend      | <a href="#">AB 312981</a>   |
| Pacific Blue anti-mouse CD45 antibody                      | Biolegend      | <a href="#">AB 493535</a>   |
| APC anti-mouse CD62L antibody                              | Biolegend      | <a href="#">AB 313099</a>   |
| APC/Cy7 anti-mouse CD62L antibody                          | Biolegend      | <a href="#">AB 830799</a>   |
| PerCP/Cy5.5 anti-mouse CD62L antibody                      | Biolegend      | <a href="#">AB 2285839</a>  |
| Alexa Fluor 647 anti-mouse CD103 antibody                  | Biolegend      | <a href="#">AB 535952</a>   |
| PE anti-mouse CD103 antibody                               | Biolegend      | <a href="#">AB 1133989</a>  |
| Brilliant Violet 605 anti-mouse CD127 (IL-7R $\alpha$ ) ab | Biolegend      | <a href="#">AB 2562114</a>  |
| Brilliant Violet 421 anti-mouse CD127 (IL-7R $\alpha$ ) ab | Biolegend      | <a href="#">AB 11218800</a> |
| PE/Cy7 anti-mouse I-A/I-E antibody                         | Biolegend      | <a href="#">AB 2290801</a>  |
| Pacific Blue anti-mouse I-A/I-E antibody                   | Biolegend      | <a href="#">AB 493527</a>   |
| APC/Cy7 anti-mouse I-A/I-E antibody                        | Biolegend      | <a href="#">AB 1659252</a>  |
| PE anti-mouse/human KLRG1 (MAFA) antibody                  | Biolegend      | <a href="#">AB 10574005</a> |
| Brilliant Violet 421 anti-mouse/human KLRG1 ab             | Biolegend      | <a href="#">AB 2565613</a>  |
| Brilliant Violet 605 anti-mouse/human KLRG1 ab             | Biolegend      | <a href="#">AB 2563357</a>  |
| Brilliant Violet 421 anti-mouse IL-33Ra (ST2)              | Biolegend      | <a href="#">AB 2565634</a>  |
| PE anti-mouse IL-33Ra (ST2)                                | Biolegend      | <a href="#">AB 2561915</a>  |
| Anti-Mouse/Rat Foxp3 Alexa Fluor 647 antibody              | Biolegend      | <a href="#">AB 763538</a>   |

|                                             |                    |                             |
|---------------------------------------------|--------------------|-----------------------------|
| Anti-Mouse/Rat Foxp3 Biotin antibody        | Biolegend          | <a href="#">AB 763540</a>   |
| Anti-Mouse/Rat Foxp3 PE antibody            | Biolegend          | <a href="#">AB 465936</a>   |
| Alexa Fluor 647 anti-Gata-3 antibody        | Biolegend          | <a href="#">AB 2563217</a>  |
| PE anti-Gata-3 antibody                     | Biolegend          | <a href="#">AB 2562723</a>  |
| PE anti-mouse IL-2 antibody                 | Biolegend          | <a href="#">AB 315302</a>   |
| PE anti-mouse IL-4 antibody                 | Biolegend          | <a href="#">AB 315318</a>   |
| PE anti-mouse IL-5 antibody                 | Biolegend          | <a href="#">AB 315327</a>   |
| PE anti-mouse IL-10 antibody                | Biolegend          | <a href="#">AB 315362</a>   |
| PE anti-mouse IL-13 antibody                | eBiosciences       | <a href="#">AB 763561</a>   |
| PE anti-mouse IL-17 antibody                | Biolegend          | <a href="#">AB 315463</a>   |
| PE anti-mouse IFN $\gamma$ antibody         | Biolegend          | <a href="#">AB 315402</a>   |
| Cxcr-5                                      | Biolegend          | <a href="#">AB 2562208</a>  |
| PD-1                                        | Biolegend          | <a href="#">AB 1877231</a>  |
| PE anti-mouse human Helios antibody         | Biolegend          | <a href="#">AB 10660749</a> |
| PE anti-mouse CD85k (gp49) ILT3 antibody    | Biolegend          | <a href="#">AB 2561654</a>  |
| AF647 anti-mouse CD85k (gp49) ILT3 antibody | Biolegend          | <a href="#">AB 2562044</a>  |
| PE/Cy7 anti-mouse CD273 (PD-L2) antibody    | Biolegend          | <a href="#">AB 2728123</a>  |
| BV510 anti-mouse CD11c antibody             | Biolegend          | <a href="#">AB 2562016</a>  |
| PE anti-mouse IRF4 antibody                 | Biolegend          | <a href="#">AB 2563005</a>  |
| Goat Anti-Rabbit IgG (H+L) antibody, AF 647 | Thermo Fisher      | <a href="#">AB 10562581</a> |
| Fixable Viability Dye eFluor 506            | eBioscience        | Cat# 65-0866-18             |
| Mouse IgM control antibody                  | BD Biosciences     | <a href="#">AB 393980</a>   |
| Mouse IgG1 control antibody                 | BD Biosciences     | <a href="#">AB 479649</a>   |
| Mouse IgG2a control antibody                | BD Biosciences     | <a href="#">AB 571927</a>   |
| Mouse IgG2b control antibody                | Santa Cruz Biotech | AB_626950                   |
| Mouse IgG3                                  | Sigma Aldrich      | Cat# 99043001               |
| Mouse IgE                                   | BD Biosciences     | <a href="#">AB 479637</a>   |
| Goat anti-mouse IgM peroxidase              | Southern Biotech   | Cat# 1020-05                |
| Goat anti-mouse IgG1 peroxidase             | Southern Biotech   | Cat# 1070-05                |
| Goat anti-mouse IgG2a peroxidase            | Southern Biotech   | Cat# 1080-05                |
| Goat anti-mouse IgG2b peroxidase            | Southern Biotech   | Cat# 1090-05                |
| Goat anti-mouse IgG3 peroxidase             | Southern Biotech   | Cat# 1100-05                |
| Donkey anti-mouse IgG antibody              | Santa Cruz         | <a href="#">AB 641171</a>   |
| APC/Cy7 Streptavidin                        | Biolegend          | Cat# 405208                 |
| eFluro450 Streptavidin                      | eBioscience        | Cat# 48-4317-82             |
| FITC Streptavidin                           | Biolegend          | Cat# 405201                 |
| PE Streptavidin                             | Biolegend          | Cat# 405204                 |
| PE/Cy7 Streptavidin                         | Biolegend          | Cat# 405206                 |
| PerCP/Cy5.5 Streptavidin                    | Biolegend          | Cat# 405214                 |
| Brilliant UV 395 Streptavidin               | BD Biosciences     | Cat# 564176                 |
| Brilliant UV 737 Streptavidin               | BD Biosciences     | Cat# 564293                 |
| APC Streptavidin                            | Biolegend          | Cat# 405207                 |
| Brilliant Violet 421 Streptavidin           | Biolegend          | Cat# 504421                 |
| Anti-rat HRP (pre-mixed)                    | Histofine          | Cat# 41431 1F               |
| <b>Primers &amp; Probes</b>                 |                    |                             |
| Taqman Probe for <i>Hprt</i>                | Thermo Fisher      | Mm01318746_g1               |
| Taqman Probe for <i>Il2ra</i>               | Thermo Fisher      | Mm01340213_m1               |
| Taqman Probe for <i>Foxp3</i>               | Thermo Fisher      | Mm00475162_m1               |
| Taqman Probe for <i>Il7r</i>                | Thermo Fisher      | Mm00434295_m1               |
| Taqman Probe for <i>Pparg</i>               | Thermo Fisher      | Mm01184322_m1               |
| Taqman Probe for <i>Tbx21</i>               | Thermo Fisher      | Mm00450960_m1               |
| Taqman Probe for <i>Irf4</i>                | Thermo Fisher      | Mm00516431_m1               |

|                                                  |                 |                               |
|--------------------------------------------------|-----------------|-------------------------------|
| Taqman Probe for <i>Gata3</i>                    | Thermo Fisher   | Mm00484683_m1                 |
| Taqman Probe for <i>Il10</i>                     | Thermo Fisher   | Mm01288386_m1                 |
| Taqman Probe for <i>Il1rl1</i>                   | Thermo Fisher   | Mm00516117_m1                 |
| Taqman Probe for <i>Rora</i>                     | Thermo Fisher   | Mm01173766_m1                 |
| Taqman Probe for <i>Rbpj</i> Exon 1-2            | Thermo Fisher   | Mm00770450_m1                 |
| Taqman Probe for <i>Rbpj</i> Exon 6-7            | Thermo Fisher   | Mm01217627_g1                 |
| Taqman Probe for <i>Dtx1</i> Exon 9-10           | Thermo Fisher   | Mm00492297_m1                 |
| Bisulfite-DNA primer for <i>Foxp3</i> R3 (TSDR)  | Reverse Primer  | TGGGTTTTTTGGTATTTAA<br>GAAAG  |
| Bisulfite-DNA primer for <i>Foxp3</i> R3 (TSDR)  | Forward Primer  | AAAAAACAAATAATCTACC<br>CCACAA |
| Rbpj Exon 1-2 Sybr Primer                        | Forward Primer  | ATGCCCTCCGGTTTTCTC            |
| Rbpj Exon 1-2 Sybr Primer                        | Reverse Primer  | GGACAAGCCCTCCGAGTA<br>GT      |
| Rbpj Exon 6-7 Sybr Primer                        | Forward Primer  | TTTCCACGCCAGTTCACAA<br>CA     |
| Rbpj Exon 6-7 Sybr Primer                        | Reverse Primer  | TCTGCCCGTAATGGATGTA<br>GC     |
| <b>Critical Chemicals</b>                        |                 |                               |
| DNase                                            | Roche           | Cat# 11284932001              |
| 5mC-dNTP mix                                     | Zymo Research   | Cat# D1030                    |
| Power SYBR Green Master Mix                      | Thermo Fisher   | Cat# 4367659                  |
| Taqman Gene Expression Master Mix                | Thermo Fisher   | Cat# 4359016                  |
| SuperScript II Reverse Transcriptase             | Thermo Fisher   | Cat# 18064071                 |
| Oligo d(T) 12-18 Primer                          | Thermo Fisher   | Cat# 18418012                 |
| Anti-biotin Microbeads                           | Miltenyi Biotec | Cat# 130-090-385              |
| Dynabeads Mouse T-Activator CD3/CD28             | Thermo Fisher   | Cat# 11456D                   |
| Mouse T-cell activation and expansion kit        | Miltenyi Biotec | Cat# 130-093-627              |
| Purified anti-mouse IFN-gamma antibody           | Biologend       | <a href="#">AB 315396</a>     |
| Recombinant murine IL-2                          | Peptotech       | Cat# 212-12                   |
| Recombinant murine IL-4                          | Peptotech       | Cat# 214-14                   |
| Recombinant murine IL-7                          | Peptotech       | Cat# E1915                    |
| Recombinant murine IL-33                         | Biologend       | Cat# 280504                   |
| Lipopolysaccharide ( <i>E.coli</i> 0127:B8)      | Sigma           | Cat# L3129                    |
| PMA/Ionomycin stim cocktail plus transport inh.  | eBioscience     | Cat# 00-4975-03               |
| Transport inhibitor control                      | eBioscience     | Cat# 00-4980-03               |
| BD Fixation Buffer                               | BD Biosciences  | Cat# 554655                   |
| BD PermBuffer III                                | BD Biosciences  | Cat# 558050                   |
| Peroxidase-blocking reagent                      | Dako            | Cat# S2023                    |
| Antibody diluent                                 | Dako            | Cat# S2022                    |
| DAB+                                             | Dako            | Cat# K5007                    |
| Wash Buffer                                      | Dako            | Cat# 3006                     |
| Hematoxylin                                      | Merck           | Cat# 1051750500               |
| <b>Critical Commercial Kits</b>                  |                 |                               |
| RNEasy Mini Kit                                  | Quiagen         | Cat# 74104                    |
| RNEasy Plus Micro Kit                            | Quiagen         | Cat# 74034                    |
| DNEasy Blood and Tissue kit                      | Quiagen         | Cat# 69504                    |
| EpiTect Bisulfite conversion kit                 | Zymo Research   | Cat# 59104                    |
| NEBNext High Fidelity Mix                        | NEB             | M0541                         |
| BCA Protein Assay Kit                            | Thermo Fisher   | Cat# 23227                    |
| Chromogenic Detection kit CN/DAB                 | Thermo Fisher   | Cat# 34000                    |
| PureLink Quick Gel Extraction Kit                | Thermo Fisher   | Cat# K210012                  |
| Foxp3 / Transcription Factor Staining Buffer Set | eBioscience     | Cat# 00-5523-00               |
| Active Caspase-3 kit                             | Abcam           | Cat# 65617                    |
| Mouse IgE ELISA kit                              | BD Biosciences  | Cat# 555248                   |

|                                       |          |               |
|---------------------------------------|----------|---------------|
| Illumina Nextera DNA library prep kit | Illumina | Cat# 15028212 |
|---------------------------------------|----------|---------------|
